# Supplementary material
Source: publisher figshare collection journal article supplement (https://acs.figshare.com/ndownloader/files/12822539)
Supplement: Supplementary file 1 [file 12822539]

Compound ID	SMILES	MIC E. coli ATCC 25922 (�g/mL)	MIC K. pneumoniae ATCC 43816 (�g/mL)	IC50 IVTT (�M)
1	c1c([nH]cn1)C[C@@H](C(=O)N[C@@H](CCCCN)C(=O)N/C(=C\CCNC(=N)N)/C(=O)N[C@@H](CCCCN)C(=O)NCCCCN)NC(=O)[C@@H]2CCCN2C(=O)[C@@H](CCCN)NC(=O)CNC(=O)[C@H]([C@H](CN)O)NC(=O)[C@H]([C@H](CN)O)NC(=O)[C@H](CCCCN)N	8	4	0.63
17	C[C@@H](C(=O)N[C@@H]([C@H](CN)O)C(=O)N[C@@H]([C@H](CN)O)C(=O)NCC(=O)N[C@H](CCCN)C(=O)N1CCC[C@H]1C(=O)N[C@@H](Cc2cnc[nH]2)C(=O)N[C@@H](CCCCN)C(=O)N/C(=C\CCNC(=N)N)/C(=O)N[C@@H](CCCCN)C(=O)NCCCCN)N	16	8	0.73
18	C[C@@H](C(=O)N[C@@H]([C@H](CN)O)C(=O)NCC(=O)N[C@H](CCCN)C(=O)N1CCC[C@H]1C(=O)N[C@@H](Cc2cnc[nH]2)C(=O)N[C@@H](CCCCN)C(=O)N/C(=C\CCNC(=N)N)/C(=O)N[C@@H](CCCCN)C(=O)NCCCCN)NC(=O)[C@H](CCCCN)N	>64	>64	4.5
19	C[C@H]([C@@H](C(=O)N[C@@H]([C@@H](C)O)C(=O)NCC(=O)N[C@H](CCCN)C(=O)N1CCC[C@H]1C(=O)N[C@@H](Cc2cnc[nH]2)C(=O)N[C@@H](CCCCN)C(=O)N[C@@H](CCCNC(=N)N)C(=O)N[C@@H](CCCCN)C(=O)NCCCCN)NC(=O)CCCCCN)O	2	1	0.63
20	C[C@H]([C@@H](C(=O)NCC(=O)N[C@H](CCCN)C(=O)N1CCC[C@H]1C(=O)N[C@@H](Cc2cnc[nH]2)C(=O)N[C@@H](CCCCN)C(=O)N[C@@H](CCCNC(=N)N)C(=O)N[C@@H](CCCCN)C(=O)NCCCCN)NC(=O)[C@H](CCN)NC(=O)[C@H](CCCCN)N)O	>64	>64	3.64
21	C[C@H](C(=O)N1CCC[C@H]1C(=O)N[C@@H](Cc2cnc[nH]2)C(=O)N[C@@H](CCCCN)C(=O)N/C(=C\CCNC(=N)N)/C(=O)N[C@@H](CCCCN)C(=O)NCCCCN)NC(=O)CNC(=O)[C@H]([C@H](CN)O)NC(=O)[C@H]([C@H](CN)O)NC(=O)[C@H](CCCCN)N	>64	>64	>40
22	C[C@@H](C(=O)N[C@@H](Cc1cnc[nH]1)C(=O)N[C@@H](CCCCN)C(=O)N/C(=C\CCNC(=N)N)/C(=O)N[C@@H](CCCCN)C(=O)NCCCCN)NC(=O)[C@@H](CCCN)NC(=O)CNC(=O)[C@H]([C@H](CN)O)NC(=O)[C@H]([C@H](CN)O)NC(=O)[C@H](CCCCN)N	16	32	2.41
23	C[C@@H](C(=O)N[C@@H](CCCCN)C(=O)N/C(=C\CCNC(=N)N)/C(=O)N[C@@H](CCCCN)C(=O)NCCCCN)NC(=O)[C@@H]1CCCN1C(=O)[C@@H](CCCN)NC(=O)CNC(=O)[C@H]([C@H](CN)O)NC(=O)[C@H]([C@H](CN)O)NC(=O)[C@H](CCCCN)N	8	8	0.39
24	C[C@@H](C(=O)N/C(=C\CCNC(=N)N)/C(=O)N[C@@H](CCCCN)C(=O)NCCCCN)NC(=O)[C@H](Cc1cnc[nH]1)NC(=O)[C@@H]2CCCN2C(=O)[C@@H](CCCN)NC(=O)CNC(=O)[C@H]([C@H](CN)O)NC(=O)[C@H]([C@H](CN)O)NC(=O)[C@H](CCCCN)N	16	4	1.85
25	C[C@@H](C(=O)N[C@@H](CCCCN)C(=O)NCCCCN)NC(=O)[C@H](CCCCN)NC(=O)[C@H](Cc1cnc[nH]1)NC(=O)[C@@H]2CCCN2C(=O)[C@@H](CCCN)NC(=O)CNC(=O)[C@H]([C@H](CN)O)NC(=O)[C@H]([C@H](CN)O)NC(=O)[C@H](CCCCN)N	>64	64	2.4
26	C[C@@H](C(=O)NCCCCN)NC(=O)/C(=C/CCNC(=N)N)/NC(=O)[C@H](CCCCN)NC(=O)[C@H](Cc1cnc[nH]1)NC(=O)[C@@H]2CCCN2C(=O)[C@@H](CCCN)NC(=O)CNC(=O)[C@H]([C@H](CN)O)NC(=O)[C@H]([C@H](CN)O)NC(=O)[C@H](CCCCN)N	8	8	1.04
27	c1c([nH]cn1)C[C@@H](C(=O)N[C@@H](CCCCN)C(=O)N/C(=C\CCNC(=N)N)/C(=O)N[C@@H](CCCCN)C(=O)NCCO)NC(=O)[C@@H]2CCCN2C(=O)[C@@H](CCCN)NC(=O)CNC(=O)[C@H]([C@H](CN)O)NC(=O)[C@H]([C@H](CN)O)NC(=O)[C@H](CCCCN)N	16	4	0.36
28	c1c(nc[nH]1)C[C@@H](C(=O)N[C@@H](CCCCN)C(=O)N/C(=C\CCNC(=N)N)/C(=O)N[C@@H](CCCCN)C(=O)NCCCCN)NC(=O)[C@@H]2CCCN2C(=O)[C@@H](CCCN)NC(=O)CNC(=O)[C@H]([C@H](CN)O)NC(=O)[C@H](CCN)NC(=O)[C@H](CCCCN)N	>64	64	5.91
29	C[C@@H]([C@@H](C(=O)N[C@@H]([C@H](CN)O)C(=O)NCC(=O)N[C@H](CCCN)C(=O)N1CCC[C@H]1C(=O)N[C@@H](Cc2c[nH]cn2)C(=O)N[C@@H](CCCCN)C(=O)N/C(=C\CCNC(=N)N)/C(=O)N[C@@H](CCCCN)C(=O)NCCCCN)NC(=O)[C@H](CCCCN)N)O	>64	>64	>40
30	c1c([nH]cn1)C[C@@H](C(=O)N[C@@H](CCCCN)C(=O)N/C(=C\CCNC(=N)N)/C(=O)N[C@@H](CCCCN)C(=O)NCCCCN)NC(=O)[C@@H]2CCCN2C(=O)[C@@H](CCCN)NC(=O)CNC(=O)[C@H]([C@H](CN)O)NC(=O)[C@H](CO)NC(=O)[C@H](CCCCN)N	>64	>64	>40
31	c1c([nH]cn1)C[C@@H](C(=O)N[C@@H](CCCCN)C(=O)N/C(=C\CCNC(=N)N)/C(=O)N[C@@H](CCCCN)C(=O)NCCCCN)NC(=O)[C@@H]2CCCN2C(=O)[C@@H](CCCN)NC(=O)CNC(=O)[C@H](CCN)NC(=O)[C@H]([C@H](CN)O)NC(=O)[C@H](CCCCN)N	4	4	1.1
32	C[C@@H]([C@@H](C(=O)NCC(=O)N[C@H](CCCN)C(=O)N1CCC[C@H]1C(=O)N[C@@H](Cc2cnc[nH]2)C(=O)N[C@@H](CCCCN)C(=O)N/C(=C\CCNC(=N)N)/C(=O)N[C@@H](CCCCN)C(=O)NCCCCN)NC(=O)[C@H]([C@H](CN)O)NC(=O)[C@H](CCCCN)N)O	8	8	1
33	c1c([nH]cn1)C[C@@H](C(=O)N[C@@H](CCCCN)C(=O)N/C(=C\CCNC(=N)N)/C(=O)N[C@@H](CCCCN)C(=O)NCCCCN)NC(=O)[C@@H]2CCCN2C(=O)[C@@H](CCCN)NC(=O)CNC(=O)[C@H](CO)NC(=O)[C@H]([C@H](CN)O)NC(=O)[C@H](CCCCN)N	4	4	0.66
34	c1c(nc[nH]1)C[C@@H](C(=O)N[C@@H](CCCCN)C(=O)N/C(=C\CCNC(=N)N)/C(=O)N[C@@H](CCCCN)C(=O)NCCCCN)NC(=O)[C@@H]2CCCN2C(=O)[C@@H](CCCN)NC(=O)CNC(=O)CNC(=O)[C@H]([C@H](CN)O)NC(=O)[C@H](CCCCN)N	8	8	1.06
35	CC(C)[C@@H](C(=O)NCC(=O)N[C@H](CCCN)C(=O)N1CCC[C@H]1C(=O)N[C@@H](Cc2c[nH]cn2)C(=O)N[C@@H](CCCCN)C(=O)N/C(=C\CCNC(=N)N)/C(=O)N[C@@H](CCCCN)C(=O)NCCCCN)NC(=O)[C@H]([C@H](CN)O)NC(=O)[C@H](CCCCN)N	4	2	0.8
36	CC[C@@H](C(=O)NCC(=O)N[C@H](CCCN)C(=O)N1CCC[C@H]1C(=O)N[C@@H](Cc2c[nH]cn2)C(=O)N[C@@H](CCCCN)C(=O)N/C(=C\CCNC(=N)N)/C(=O)N[C@@H](CCCCN)C(=O)NCCCCN)NC(=O)[C@H]([C@H](CN)O)NC(=O)[C@H](CCCCN)N	4	4	0.73
37	C/C=C(/C(=O)N[C@@H](CCCCN)C(=O)NCCCCN)\NC(=O)[C@H](CCCCN)NC(=O)[C@H](Cc1cnc[nH]1)NC(=O)[C@@H]2CCCN2C(=O)[C@@H](CCCN)NC(=O)CNC(=O)[C@H]([C@H](CN)O)NC(=O)[C@H]([C@H](CN)O)NC(=O)[C@H](CCCCN)N	16	8	0.83
38	c1c([nH]cn1)C[C@@H](C(=O)N[C@@H](CCCCN)C(=O)N[C@@H](CCCNC(=N)N)C(=O)N[C@@H](CCCCN)C(=O)NCCCCN)NC(=O)[C@@H]2CCCN2C(=O)[C@@H](CCCN)NC(=O)CNC(=O)[C@H]([C@H](CN)O)NC(=O)[C@H]([C@H](CN)O)NC(=O)[C@H](CCCCN)N	32	8	1.53
39	c1c([nH]cn1)C[C@@H](C(=O)N[C@@H](CCCCN)C(=O)N[C@H](CCCNC(=N)N)C(=O)N[C@@H](CCCCN)C(=O)NCCCCN)NC(=O)[C@@H]2CCCN2C(=O)[C@@H](CCCN)NC(=O)CNC(=O)[C@H]([C@H](CN)O)NC(=O)[C@H]([C@H](CN)O)NC(=O)[C@H](CCCCN)N	16	16	0.98
40	c1c([nH]cn1)C[C@@H](C(=O)N[C@@H](CCCCN)C(=O)N/C(=C\CCNC(=N)N)/C(=O)N[C@@H](CCCCN)C(=O)NCCO)NC(=O)[C@@H]2CCCN2C(=O)[C@@H](CCCN)NC(=O)CNC(=O)[C@H]([C@H](CN)O)NC(=O)[C@H]([C@H](CN)O)NC(=O)[C@H](CCCCN)N	16	4	0.36
41	c1c([nH]cn1)C[C@@H](C(=O)N[C@@H](CCCCN)C(=O)N/C(=C\CCNC(=N)N)/C(=O)O)NC(=O)[C@@H]2CCCN2C(=O)[C@@H](CCCN)NC(=O)CNC(=O)[C@H]([C@H](CN)O)NC(=O)[C@H]([C@H](CN)O)NC(=O)[C@H](CCCCN)N	16	4	0.43
42	c1c([nH]cn1)C[C@@H](C(=O)N[C@@H](CCCCN)C(=O)O)NC(=O)[C@@H]2CCCN2C(=O)[C@@H](CCCN)NC(=O)CNC(=O)[C@H]([C@H](CN)O)NC(=O)[C@H]([C@H](CN)O)NC(=O)[C@H](CCCCN)N	>64	>64	10.01
43	c1c([nH]cn1)C[C@@H](C(=O)O)NC(=O)[C@@H]2CCCN2C(=O)[C@@H](CCCN)NC(=O)CNC(=O)[C@H]([C@H](CN)O)NC(=O)[C@H]([C@H](CN)O)NC(=O)[C@H](CCCCN)N	>64	>64	9.6
44	c1c([nH]cn1)C[C@@H](C(=O)N[C@@H](CCCCN)C(=O)N/C(=C\CCNC(=N)N)/C(=O)N[C@@H](CCCCN)C(=O)NCCCCN)NC(=O)[C@@H]2CCCN2C(=O)[C@@H](CCCN)NC(=O)CNC(=O)[C@H]([C@H](CN)O)NC(=O)[C@H]([C@H](CN)O)N	>64	>64	>40
45	c1c([nH]cn1)C[C@@H](C(=O)N[C@@H](CCCCN)C(=O)N/C(=C\CCNC(=N)N)/C(=O)N[C@@H](CCCCN)C(=O)NCCCCN)NC(=O)[C@@H]2CCCN2C(=O)[C@@H](CCCN)NC(=O)CNC(=O)[C@H]([C@H](CN)O)N	>64	>64	>40
46	C[C@@H](C(=O)NCC(=O)N[C@H](CCCN)C(=O)N1CCC[C@H]1C(=O)N[C@@H](Cc2cnc[nH]2)C(=O)N[C@@H](CCCCN)C(=O)N/C(=C\CCNC(=N)N)/C(=O)O)NC(=O)[C@H]([C@H](CN)O)NC(=O)[C@H](CCCCN)N	16	4	0.55
